# Supplementary material for: A multidimensional hierarchical structure designed for lateral strain-isolated ultrasensitive pressure sensing
Source: Royal Society of Chemistry journal article supplement (doi:10.1039/c9tc06213k), 2019-12-05
Supplement: c9tc06213k1.pdf [file c9tc06213k1.pdf]

**Multidimensional hierarchical structure designed for lateral strain-isolated ultrasensitive pressure sensing**

*Junyun Li<sup>1</sup>, Song Chen<sup>1</sup>, Zefei Peng, Zhifu Deng, Shuting Xing, Yaoyi Wu, Shuqi Liu, Lan Liu\**

*\*College of Materials Science and Engineering, Key Lab of Guangdong Province for High Property and Functional Macromolecular Materials, South China University of Technology, Guangzhou, 510640, P. R. China.*

[<sup>1</sup> These authors contribute equally to this work.](#)

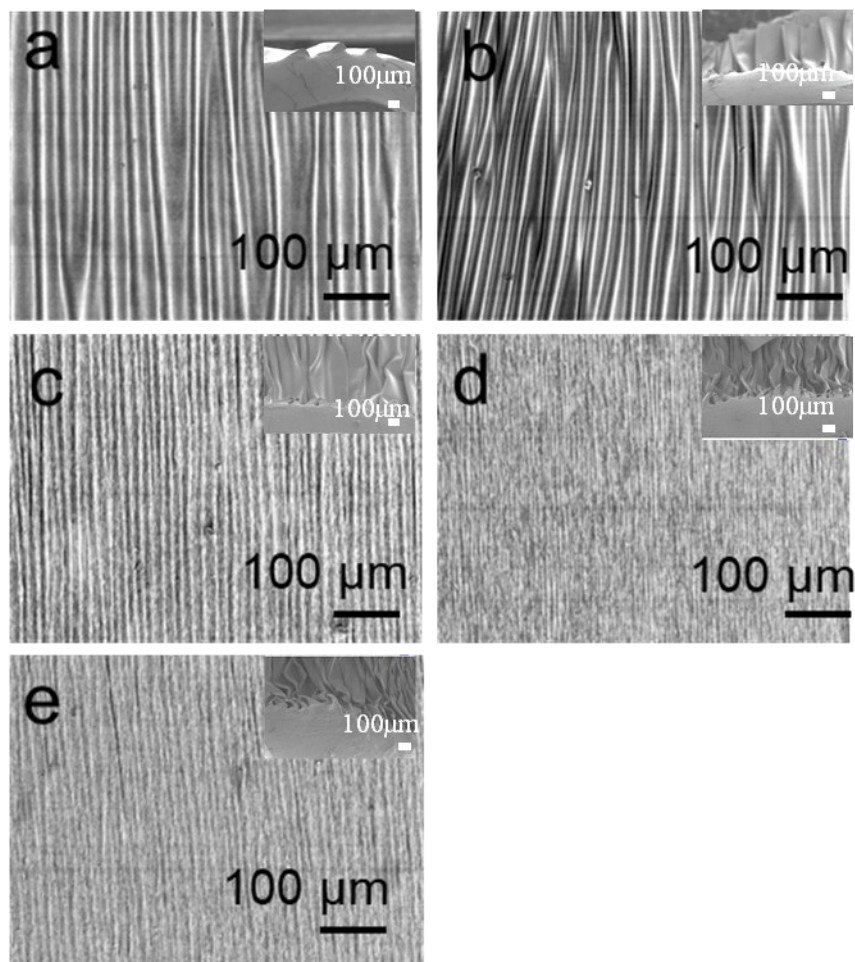

**Fig. S1** Surface SEM morphology of AgNWs/PVA/VHB™ SUPS prepared by different VHB™ pre-stretch degrees: 10% (a), 50% (b), 100% (c), 200% (d) and 300% (e), respectively.

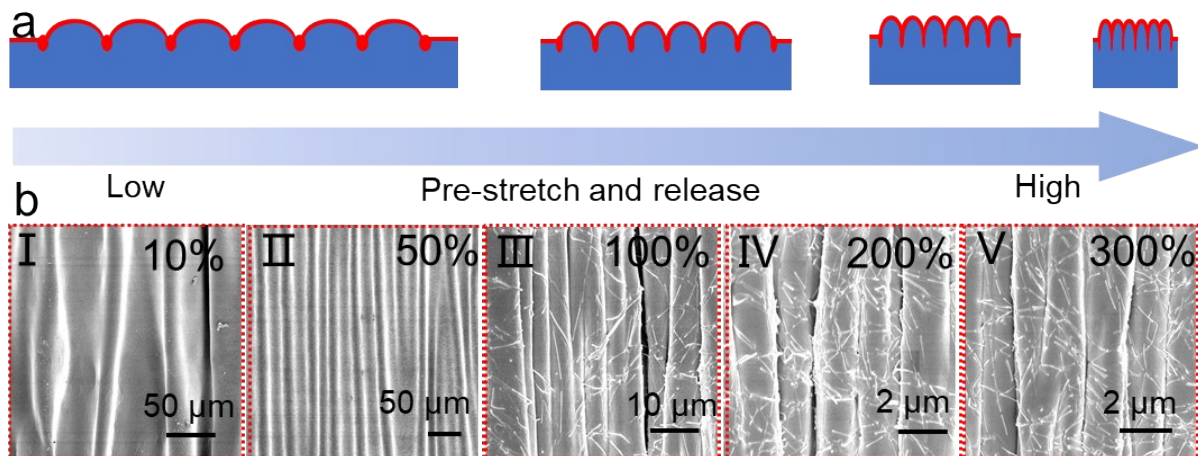

**Fig. S2** Schematic diagram of the surface wrinkle morphology of SUPS with different pre-stretch degrees (a) and corresponding SEM images (b).

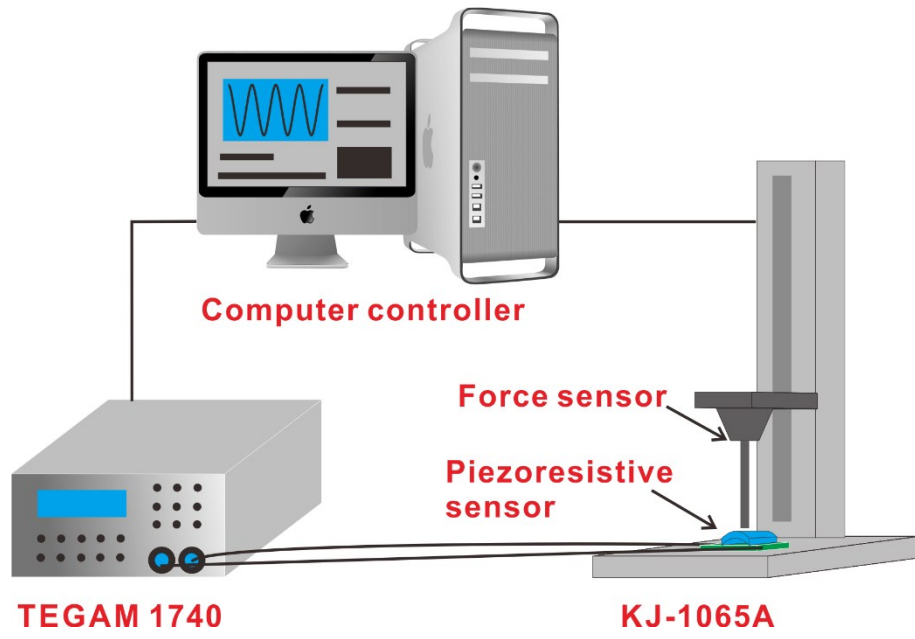

**Fig. S3** Schematic of the resistance measurement

Table S1 Summary of sensitivity for the piezoresistive sensors prepared with different pre-stretching degrees

| Piezoresistive sensors | Sensitivity in stage I (kPa <sup>-1</sup> ) | Sensitivity in stage II (kPa <sup>-1</sup> ) |
|------------------------|---------------------------------------------|----------------------------------------------|
| 100% pre-stretch       | 4.54                                        | 0.052                                        |
| 200% pre-stretch       | 4.54                                        | 0.25                                         |
| 300% pre-stretch       | 4.54                                        | 0.55                                         |
